# Supplementary material for: A high-resolution recombination map of the human genome
Source: Springer Nature journal article supplement (doi:10.1038/ng917), 2002-06-10
Supplement: ng917-S9.pdf [file ng917-S9.pdf]

---

**Web Table A** Family summary

---

| Parents with genotypes | 2 sibs | 3 sibs | 4 sibs | 5 sibs | 6 sibs | 7 sibs | Total |
|------------------------|--------|--------|--------|--------|--------|--------|-------|
| father and mother      | 7      | 26     | 46     | 12     | 3      | 1      | 95    |
| mother                 | 1      | 1      | 2      | 14     | 9      | 1      | 28    |
| father                 | 0      | 1      | 11     | 5      | 5      | 2      | 24    |
| neither                | 1      | 0      | 0      | 1      | 0      | 0      | 2     |
| total                  | 9      | 28     | 59     | 32     | 17     | 4      | 149   |

---

In this study 146 families were used, consisting of 149 sibships -- as two multiplex families consist of 2 and 3 sibships each.

---
