# Supplementary material for: A high-resolution recombination map of the human genome
Source: Springer Nature journal article supplement (doi:10.1038/ng917), 2002-06-10
Supplement: ng917-S16.pdf [file ng917-S16.pdf]

**Web Table H** Summaries for the 62 sib-ships used to study the existence of father and mother effects

| <b>family</b> | <b># siblings</b> | <b>paternal mean</b> | <b>paternal variance</b> | <b>maternal mean</b> | <b>maternal variance</b> |
|---------------|-------------------|----------------------|--------------------------|----------------------|--------------------------|
| f-35          | 4                 | 25.2                 | 35.1                     | 46.3                 | 77.3                     |
| f-36          | 4                 | 26.0                 | 6.2                      | 47.8                 | 11.8                     |
| f-37          | 4                 | 25.7                 | 14.5                     | 46.6                 | 22.0                     |
| f-38          | 4                 | 23.3                 | 32.0                     | 48.5                 | 86.9                     |
| f-39          | 4                 | 22.7                 | 39.8                     | 49.8                 | 115.8                    |
| f-40          | 4                 | 25.8                 | 15.5                     | 44.5                 | 11.6                     |
| f-41          | 4                 | 22.7                 | 6.7                      | 46.5                 | 48.2                     |
| f-42          | 4                 | 25.7                 | 15.5                     | 39.8                 | 106.6                    |
| f-43          | 4                 | 25.9                 | 9.3                      | 46.7                 | 83.0                     |
| f-44          | 4                 | 26.6                 | 20.1                     | 43.9                 | 6.9                      |
| f-45          | 4                 | 25.1                 | 4.1                      | 45.1                 | 27.5                     |
| f-46          | 4                 | 25.8                 | 20.6                     | 44.4                 | 48.9                     |
| f-48          | 4                 | 22.8                 | 15.0                     | 56.6                 | 25.0                     |
| f-49          | 4                 | 25.0                 | 15.5                     | 43.5                 | 76.8                     |
| f-50          | 4                 | 25.8                 | 11.3                     | 42.2                 | 91.7                     |
| f-51          | 4                 | 28.2                 | 1.5                      | 47.2                 | 59.9                     |
| f-52          | 4                 | 21.5                 | 13.2                     | 39.3                 | 58.4                     |
| f-53          | 4                 | 23.9                 | 21.1                     | 40.9                 | 23.2                     |
| f-54          | 4                 | 27.2                 | 4.4                      | 41.6                 | 13.0                     |
| f-55          | 4                 | 21.1                 | 2.4                      | 39.9                 | 101.4                    |
| f-56          | 4                 | 34.2                 | 23.2                     | 42.7                 | 129.9                    |
| f-57          | 4                 | 26.9                 | 17.9                     | 51.0                 | 66.8                     |
| f-58          | 4                 | 22.6                 | 7.2                      | 41.3                 | 65.3                     |
| f-59          | 4                 | 26.1                 | 34.1                     | 39.7                 | 8.8                      |
| f-60          | 4                 | 26.0                 | 10.6                     | 43.8                 | 74.3                     |
| f-61          | 4                 | 26.7                 | 30.8                     | 44.9                 | 50.1                     |
| f-62          | 4                 | 23.6                 | 47.7                     | 44.6                 | 30.9                     |
| f-63          | 4                 | 25.7                 | 25.1                     | 43.1                 | 91.5                     |
| f-65          | 4                 | 25.1                 | 24.6                     | 42.1                 | 27.7                     |
| f-66          | 4                 | 24.3                 | 1.7                      | 36.0                 | 56.6                     |
| f-67          | 4                 | 27.6                 | 10.5                     | 45.2                 | 55.3                     |
| f-68          | 4                 | 27.1                 | 29.4                     | 56.0                 | 65.5                     |
| f-69          | 4                 | 23.6                 | 28.6                     | 33.6                 | 3.0                      |
| f-70          | 4                 | 28.2                 | 20.4                     | 44.5                 | 53.2                     |
| f-71          | 4                 | 25.4                 | 7.6                      | 35.0                 | 18.2                     |
| f-72          | 4                 | 27.2                 | 11.9                     | 35.9                 | 8.5                      |
| f-73          | 4                 | 26.6                 | 18.0                     | 50.6                 | 80.9                     |
| f-74          | 4                 | 25.2                 | 31.7                     | 39.2                 | 0.7                      |
| f-75          | 4                 | 27.7                 | 23.0                     | 44.1                 | 13.2                     |
| f-76          | 4                 | 24.8                 | 11.7                     | 45.8                 | 23.9                     |
| f-77          | 4                 | 27.7                 | 19.9                     | 39.0                 | 50.3                     |
| f-78          | 4                 | 25.0                 | 13.6                     | 47.6                 | 56.4                     |
| f-79          | 4                 | 30.0                 | 1.7                      | 40.8                 | 51.8                     |
| f-80          | 4                 | 26.6                 | 21.1                     | 38.0                 | 37.1                     |
| f-81          | 4                 | 24.5                 | 8.5                      | 50.7                 | 168.7                    |
| f-82          | 4                 | 22.7                 | 24.5                     | 42.9                 | 36.8                     |
| f-95          | 5                 | 26.0                 | 7.2                      | 48.6                 | 32.5                     |
| f-96          | 5                 | 26.7                 | 24.4                     | 41.7                 | 21.8                     |
| f-97          | 5                 | 24.6                 | 2.6                      | 42.3                 | 80.5                     |
| f-98          | 5                 | 27.4                 | 19.1                     | 49.1                 | 75.8                     |
| f-99          | 5                 | 22.0                 | 27.2                     | 47.6                 | 80.4                     |
| f-100         | 5                 | 25.4                 | 5.3                      | 47.8                 | 54.8                     |
| f-101         | 5                 | 23.5                 | 3.4                      | 38.6                 | 26.0                     |
| f-102         | 5                 | 27.9                 | 2.7                      | 38.5                 | 45.3                     |
| f-103         | 5                 | 24.4                 | 2.5                      | 38.7                 | 58.3                     |
| f-104         | 5                 | 26.7                 | 43.8                     | 43.7                 | 38.5                     |
| f-105         | 5                 | 23.7                 | 5.0                      | 50.6                 | 180.7                    |
| f-106         | 5                 | 24.2                 | 12.6                     | 46.9                 | 107.1                    |
| f-126         | 6                 | 26.3                 | 14.0                     | 41.6                 | 51.9                     |
| f-127         | 6                 | 25.3                 | 15.5                     | 49.2                 | 128.1                    |
| f-128         | 6                 | 26.9                 | 31.2                     | 40.9                 | 12.4                     |
| f-143         | 7                 | 25.7                 | 7.2                      | 50.1                 | 42.7                     |

The family averages and variances are for the number of recombinations over the whole genome.
